# Supplementary material
Source: PubMed Central journal article supplement (PMC9449794)
Supplement: jama-e2213885-s001.pdf [file jama-e2213885-s001.pdf]

## Supplemental Online Content

Lamprea-Montealegre JA, Madden E, Tummalapalli SL, et al. Association of race and ethnicity with prescription of SGLT2 inhibitors and GLP1 receptor agonists among patients with type 2 diabetes in the Veterans Health Administration system. *JAMA*. doi:10.1001/jama.2022.13885

**eTable 1.** Demographic and Clinical Characteristics of Patients With Type 2 Diabetes in the Veterans Health Administration System From 2019 to 2020 by Ethnicity Categories

**eTable 2.** VHA Facility Complexity Level

**eTable 3.** Covariate Definition and Method of Ascertainment

**eTable 4.** System characteristics and SGLT2i and GLP1-RA prescription

**eTable 5.** Type of VHA Facility and Driving Distance to Tertiary VHA Facility by Race Group

**eTable 6.** Association of Race and Ethnicity Categories With SGLT2i and GLP1-RA Prescription With Further Adjustment for VHA Facility Type and Driving Time to Tertiary Care VHA Center

**eTable 7.** Association of Race and Ethnicity With SGLT2i and GLP1-RA Prescription Restricting Study Sample to Patients With at Least Two Prescription Fills During in One Year

**eTable 8.** Incident Prescription Rates for SGLT2i From 2017 to 2021

**eTable 9.** Incident Prescription Rates for GLP1-RA From 2017 to 2021

**eFigure 1.** Algorithm for Ascertainment of Type 2 Diabetes Cases in Electronic Health Records

**eFigure 2.** Identification of the Study Sample

**eFigure 3.** Association Between Race and Ethnicity Groups and SGLT2i Prescription With Sequential Adjustment for Patient and System-Level Characteristics

**eFigure 4.** Association Between Race and Ethnicity Groups and GLP1-RA prescription With Sequential Adjustment for Patient and System-Level Characteristics

**eFigure 5.** Variability in SGLT2i Prescription Across VHA Stations

**eFigure 6.** Variability in GLP1-RA Prescription Across VHA Stations

**eFigure 7.** Prescription of SGLT2i and GLP1-RA Comparing American Indian or Alaska Native Patients versus White Patients Across Patient- and System-Level Characteristics

**eFigure 8.** Prescription of SGLT2i and GLP1-RA Comparing Asian, Native Hawaiian or Other Pacific Islander Patients versus White Patients Across Patient- and System-Level Characteristics

**eFigure 9.** Prescription of SGLT2i and GLP1-RA Comparing Multiracial Patients versus White Patients Across Patient- and System-Level Characteristics

**eFigure 10.** Prescription of SGLT2i and GLP1-RA Comparing Patients With Unknown Race versus White Patients Across Patient- and System-Level Characteristics

**eFigure 11.** Incident Prescription Rates for SGLT2i From 2017 to 2021 Across Race Groups

**eFigure 12.** Incident Prescription Rates for SGLT2i From 2017 to 2021 Across Ethnicity Groups

**eFigure 13.** Incident Prescription Rates for GLP1-RA From 2017 to 2021 Across Race Groups

**eFigure 14.** Incident Prescription Rates for GLP1-RA From 2017 to 2021 Across Ethnicity Groups

**eAppendix.** Sensitivity Analyses

**eReferences**

This supplemental material has been provided by the authors to give readers additional information about their work.

**eTable 1.** Demographic and clinical characteristics of patients with type 2 diabetes in the Veterans Health Administration system from 2019 to 2020 by ethnicity<sup>a</sup> categories

| <b>Characteristics</b>                                    | <b>Hispanic or Latino<br/>(n=85,034)</b> | <b>Not Hispanic or Latino<br/>(n=1,072,958)</b> | <b>Unknown Ethnicity<br/>(n=39,922)</b> |
|-----------------------------------------------------------|------------------------------------------|-------------------------------------------------|-----------------------------------------|
| <b>Socio-demographic</b>                                  |                                          |                                                 |                                         |
| Mean age (SD)                                             | 65 (12.4)                                | 68 (10.7)                                       | 68 (11.2)                               |
| Female                                                    | 2,857 (3%)                               | 43,956 (4%)                                     | 1,602 (4%)                              |
| Male                                                      | 82,177 (97%)                             | 1,029,002 (96%)                                 | 38,320 (96%)                            |
| Race                                                      |                                          |                                                 |                                         |
| American Indian or Alaska Native                          | 1,349 (2%)                               | 8,568 (1%)                                      | 210 (1%)                                |
| Native Hawaiian or Other Pacific Islander                 | 2,040 (2%)                               | 22,069 (2%)                                     | 554 (1%)                                |
| Black or African American                                 | 3,584 (4%)                               | 228,027 (21%)                                   | 3,321 (8%)                              |
| White                                                     | 64,278 (76%)                             | 774,338 (72%)                                   | 12,032 (30%)                            |
| Multiracial                                               | 939 (1%)                                 | 8,678 (1%)                                      | 178 (0%)                                |
| Unknown Race                                              | 12,844 (15%)                             | 31,278 (3%)                                     | 23,627 (59%)                            |
| Service-connected disability >50% <sup>b</sup>            | 42,981 (51%)                             | 480,430 (45%)                                   | 17,432 (44%)                            |
| Diabetes service connection <sup>b</sup>                  | 20,263 (24%)                             | 271,427 (25%)                                   | 9,376 (23%)                             |
| Lowest ZIP Code median income quartile (income <\$44,818) | 32,310 (38%)                             | 255,373 (24%)                                   | 8,785 (22%)                             |
| Highest social deprivation index quartile (score>73)      | 28,968 (34%)                             | 249,298 (23%)                                   | 94,81 (24%)                             |
| Rural or highly rural ZIP Code                            | 14,538 (17%)                             | 417,902 (39%)                                   | 15,103 (38%)                            |
| <b>Lifestyle</b>                                          |                                          |                                                 |                                         |
| Unhealthy alcohol use <sup>c</sup>                        | 7,027 (8%)                               | 86,126 (8%)                                     | 3,151 (8%)                              |
| Current smoking                                           | 10,534 (12%)                             | 187,453 (17%)                                   | 6,499 (16%)                             |
| <b>Diabetes management and control</b>                    |                                          |                                                 |                                         |
| Hb A1C ≤7%                                                | 41,897 (49%)                             | 557,682 (52%)                                   | 20,014 (50%)                            |
| Hb A1c >7-8%                                              | 18,003 (21%)                             | 242,886 (23%)                                   | 8,627 (22%)                             |
| Hb A1c >8-9%                                              | 9,686 (11%)                              | 111,119 (10%)                                   | 3,958 (10%)                             |
| HB A1c >9%                                                | 10,416 (12%)                             | 100,082 (9%)                                    | 3,623 (9%)                              |
| Unknown                                                   | 5,032 (6%)                               | 61,189 (6%)                                     | 3,700 (9%)                              |
| Lifetime max. mean Hb A1c (SD)                            | 9.1 (2.2)                                | 8.7 (2.1)                                       | 8.7 (2.1)                               |
| Lifetime max. median HbA1c (IQR)                          | 8.7 (7.3-10.5)                           | 8.20 (7.0-9.9)                                  | 8.1 (7.0-9.8)                           |
|                                                           |                                          |                                                 |                                         |

| Characteristics                                                 | Hispanic or Latino<br>(n=85,034) | Not Hispanic or Latino<br>(n=1,072,958) | Unknown Ethnicity<br>(n=39,922) |
|-----------------------------------------------------------------|----------------------------------|-----------------------------------------|---------------------------------|
| <b>Clinical Characteristics</b>                                 |                                  |                                         |                                 |
| Hypertension                                                    | 75,662 (89%)                     | 96,9351 (90%)                           | 34,157 (86%)                    |
| BMI ≥30 kg/m <sup>2</sup>                                       | 44,837 (53%)                     | 606,477 (57%)                           | 22,061 (55%)                    |
| CKD                                                             | 19,599 (23%)                     | 30,0511 (28%)                           | 1,0921 (27%)                    |
| Unknown CKD                                                     | 20,298 (24%)                     | 268,579 (25%)                           | 10,819 (27%)                    |
| ASCVD                                                           | 16,185 (19%)                     | 281,653 (26%)                           | 9,629 (24%)                     |
| Heart Failure                                                   | 4,296 (5%)                       | 73,276 (7%)                             | 2,419 (6%)                      |
| <b>VHA station parent facility complexity level<sup>d</sup></b> |                                  |                                         |                                 |
| 1a (highest)                                                    | 54,631 (64%)                     | 439,952 (41%)                           | 20,403 (51%)                    |
| 1b (high)                                                       | 10,482 (12%)                     | 180,027 (17%)                           | 5,180 (13%)                     |
| 1c (mid-high)                                                   | 5,293 (6%)                       | 176,986 (16%)                           | 4,865 (12%)                     |
| 2 (medium)                                                      | 8,404 (10%)                      | 14,3017 (13%)                           | 5,152 (13%)                     |
| 3 (low)                                                         | 6,017 (7%)                       | 128,164 (12%)                           | 4,096 (10%)                     |
| <b>Census region of VHA station</b>                             |                                  |                                         |                                 |
| South                                                           | 33,978 (40%)                     | 509,367 (47%)                           | 17,043 (43%)                    |
| West                                                            | 25,731 (30%)                     | 181,537 (17%)                           | 10,894 (27%)                    |
| Midwest                                                         | 4,916 (6%)                       | 247,860 (23%)                           | 8,266 (21%)                     |
| Northeast                                                       | 5,370 (6%)                       | 131,226 (12%)                           | 3,571 (9%)                      |

Cells are n (%) unless otherwise specified

Abbreviations: SD, standard deviation; SGLT2i, sodium-glucose co-transporter 2 inhibitor; GLP1-RA, glucagon-like peptide-1 receptor-agonist; BMI, body mass index; ASCVD, atherosclerotic cardiovascular disease; CKD, chronic kidney disease; Hb A1c, hemoglobin A1c

<sup>a</sup> VHA collects race and ethnicity information based on a two-question self-identified method. The first question asks patients to classify their ethnicity: Hispanic or Latino (yes/no). The second question asks patients to classify their race (> 1 classification may be selected): American Indian or Alaska Native; Asian; Black or African American; Native Hawaiian or other Pacific Islander; White; unknown race by patient or declined to answer.

<sup>b</sup>VHA assigns a given disability (e.g. diabetes), a rating to indicate the severity of their service-connected condition. Patients with a disability rating >50% and those in whom diabetes is a service-connected condition do not have co-payments for their medications.

<sup>c</sup> Alcohol Use Disorder Identification Test (AUDIT) score ≥ 3 for women and ≥4 for men

<sup>d</sup> VHA complexity rating is assigned to each VHA station based on the classification of the parent facility within the station encompassing facility volume, intensive care availability, number of sub-specialists per patient, and teaching/research capacity.

**eTable 2.** VHA Facility Complexity Level

| <b>Complexity Level</b> | <b>Facility description</b>                                                                                                                |
|-------------------------|--------------------------------------------------------------------------------------------------------------------------------------------|
| 1a-Highest complexity   | Facilities with high-volume, high-risk patients, most complex clinical programs and large research and teaching-programs                   |
| 1b-High complexity      | Facilities with medium-high volume, high-risk patients, many complex clinical problems, and medium sized research and teaching programs.   |
| 1c-Mid-high complexity  | Facilities with medium-high volume, medium-risk patients, some complex clinical programs, and medium sized research and teaching programs. |
| 2-Medium complexity     | Facilities with medium-volume, low-risk patients, few complex clinical programs, and small or no research teaching programs.               |
| 3-Low complexity        | Facilities with low-volume, low-risk patients, few or no complex clinical programs, and small or no research teaching programs.            |

This rating is assigned to each station based on the classification of the parent facility within the station

**eTable 3.** Covariate definition and method of ascertainment

| <b>Covariate</b>                                                    | <b>Definition and ascertainment</b>                                                                                                                                                                                                                                                                                                                                                                                                    |
|---------------------------------------------------------------------|----------------------------------------------------------------------------------------------------------------------------------------------------------------------------------------------------------------------------------------------------------------------------------------------------------------------------------------------------------------------------------------------------------------------------------------|
| <b>Income</b>                                                       | Median per capita income of residential ZIP Code <sup>1</sup>                                                                                                                                                                                                                                                                                                                                                                          |
| <b>Socio-economic status</b>                                        | ZIP Code social deprivation index score <sup>2</sup>                                                                                                                                                                                                                                                                                                                                                                                   |
| <b>Rurality of residence</b>                                        | Categories (rural, highly rural, or urban) assigned based on Rural-Urban Community Area (RUCA) codes which consider population density as well as how closely a community is linked socioeconomically to a large urban center <sup>3</sup>                                                                                                                                                                                             |
| <b>VHA disability ratings</b>                                       | VHA assigned disability (e.g., diabetes) rating to indicate the severity of their service-connected condition. These disability ratings determine how much disability compensation a Veteran receives each month as well as their eligibility for VHA benefits. The disability rating is expressed as a percentage, representing how much the disability decreases the patients' overall health and ability to function <sup>4</sup> . |
| <b>VHA station geographic location</b>                              | United States Census Bureau classification of U.S. Divisions which are nested in the four Census U.S. Regions: New England and Middle Atlantic Divisions in the Northeast region; East North Central and West North Central Divisions in the Midwest Region; South Atlantic, East South Central, and West South-Central Divisions in the South Region, and the Mountain and Pacific Division in the West Region                        |
| <b>Smoking status</b>                                               | VHA Corporate Data Warehouse indicator: current smoker, former smoker, never smoker                                                                                                                                                                                                                                                                                                                                                    |
| <b>Alcohol use</b>                                                  | Alcohol Use Disorder Identification Test (AUDIT) identification of alcohol use disorder with unhealthy alcohol use defined as an AUDIT-C score $\geq 3$ for women and $\geq 4$ for men <sup>5</sup>                                                                                                                                                                                                                                    |
| <b>Mental health diagnosis</b>                                      | A mental health diagnosis comprised the presence of an ICD-10 code encompassing post-traumatic health disorder or other severe mental illness <sup>6</sup>                                                                                                                                                                                                                                                                             |
| <b>Chronic kidney disease</b>                                       | e-Phenotype algorithm for CKD ascertainment in electronic health records which combines estimated glomerular filtration (eGFR) rate and urinary albumin to creatinine (ACR) ratio values for CKD ascertainment. CKD is defined as at least two measures of eGFR $<60$ ml/min/1.73 m <sup>2</sup> and /or an ACR $>30$ mg/g obtained more than 90 days apart. Only outpatient values were used <sup>7</sup>                             |
| <b>Kidney disease improving global outcomes (KDIGO) CKD staging</b> | For patients with CKD: eGFR stages G1 to G5 and ACR stages A1 to A3 <sup>8</sup> . CKD status and CKD stage was assessed at baseline. We excluded patients with CKD if an outpatient eGFR was less than 15 at any point from January 1 <sup>st</sup> , 2019, to December 31 <sup>st</sup> , 2020 (eFigure 2).                                                                                                                          |
| <b>Atherosclerotic cardiovascular disease</b>                       | (ICD-10) codes for ischemic heart disease or ischemic stroke being present on at least two inpatient and/or outpatient encounters <sup>9</sup>                                                                                                                                                                                                                                                                                         |
| <b>Heart Failure</b>                                                | (ICD-10) codes for heart failure being present on at least two inpatient or outpatient occasions <sup>10</sup>                                                                                                                                                                                                                                                                                                                         |
| <b>COVID diagnosis</b>                                              | VHA Corporate Data Warehouse indicator for COVID diagnosis from 2019 to 2020                                                                                                                                                                                                                                                                                                                                                           |
| <b>Hypertension</b>                                                 | eMERGE algorithm for hypertension ascertainment in electronic health records which combine blood pressure measurements, ICD codes, and utilization of medications for hypertension <sup>11</sup>                                                                                                                                                                                                                                       |
| <b>Frailty</b>                                                      | VHA frailty index encompasses variables related to mobility, functional status, cognition and mood, sensory impairment (e.g., hearing, or visual impairment), and other geriatric syndromes (e.g., incontinence) <sup>12</sup>                                                                                                                                                                                                         |

**eTable 4.** System characteristics and SGLT2i and GLP1-RA prescription

|                                      | <b>SGLT2i</b>                              | <b>GLP1-RA</b>                             |
|--------------------------------------|--------------------------------------------|--------------------------------------------|
|                                      | <b>Multivariable Model<br/>OR (95% CI)</b> | <b>Multivariable model<br/>OR (95% CI)</b> |
| <b>VHA facility complexity level</b> |                                            |                                            |
| 1A-Highest complexity                | <b>Reference</b>                           | <b>Reference</b>                           |
| 1B-High complexity                   | 0.64 (0.57, 0.71)                          | 0.56 (0.49, 0.63)                          |
| 1C-Mid-high complexity               | 0.51 (0.46, 0.57)                          | 0.39 (0.35, 0.44)                          |
| 2-Medium complexity                  | 0.60 (0.54, 0.66)                          | 0.68 (0.61, 0.71)                          |
| 3-Low complexity                     | 1.02 (0.92, 1.12)                          | 1.38 (1.24, 1.54)                          |
| <b>Division</b>                      |                                            |                                            |
| East North Central                   | <b>Reference</b>                           | <b>Reference</b>                           |
| East South Central                   | 1.40 (0.90, 2.17)                          | 1.78 (1.03, 3.08)                          |
| Middle Atlantic                      | 0.92 (0.62, 1.37)                          | 1.06 (0.65, 1.73)                          |
| Mountain                             | 0.72 (0.48, 1.09)                          | 0.99 (0.60, 1.64)                          |
| New England                          | 1.45 (0.90, 2.33)                          | 1.34 (0.74, 2.41)                          |
| Pacific                              | 1.02 (0.70, 1.51)                          | 1.12 (0.70, 1.81)                          |
| South Atlantic                       | 1.28 (0.90, 1.80)                          | 1.08 (0.70, 1.66)                          |
| West North Central                   | 1.44 (0.90, 2.32)                          | 1.15 (0.64, 2.07)                          |
| West South Central                   | 0.95 (0.64, 1.40)                          | 0.78 (0.48, 1.26)                          |

Multivariable models adjusted for demographic factors, Zip Code median income, Zip Code social deprivation index, VHA diabetes and service connection, rurality, smoking status, unhealthy alcohol use, hemoglobin A1C, other anti-diabetic agents, hypertension, body mass index, mental health diagnosis, ASCVD, heart failure, no CKD, CKD: estimated GFR and albuminuria categories, number of primary care, cardiology, endocrinology, and nephrology visits, VHA frailty index, COVID-19 diagnosis, VHA station parent facility-complexity level, United States Census Division.

**eTable 5.** Type of VHA facility and driving distance to tertiary VHA facility by race group

| <b>Characteristics</b>                            | <b>American Indian or Alaska Native<br/>(N=10,127)</b> | <b>Asian, Native Hawaiian or Other Pacific Islander<br/>(N=24,663)</b> | <b>Black<br/>(N=234,932)</b> | <b>White<br/>(N=850,648)</b> | <b>Multiracial<br/>(N=9,795)</b> | <b>Unknown race<br/>(N=67,749)</b> |
|---------------------------------------------------|--------------------------------------------------------|------------------------------------------------------------------------|------------------------------|------------------------------|----------------------------------|------------------------------------|
| <b>Type of VHA facility</b>                       |                                                        |                                                                        |                              |                              |                                  |                                    |
| VHA medical center                                | 3,342 (33%)                                            | 7,555 (31%)                                                            | 109,936 (47%)                | 283,381 (33%)                | 3,664 (37%)                      | 20,026 (30%)                       |
| Community based outpatient clinic                 | 5,664 (56%)                                            | 12,461 (51%)                                                           | 101,619 (43%)                | 479,110 (56%)                | 4,836 (49%)                      | 39,099 (58%)                       |
| Other                                             | 1,121 (11%)                                            | 4,647 (19%)                                                            | 23,377 (10%)                 | 88,157 (10%)                 | 1,295 (13%)                      | 8,624 (13%)                        |
| <b>Driving time to tertiary care VHA facility</b> |                                                        |                                                                        |                              |                              |                                  |                                    |
| Mean time in minutes (SD)                         | 131 (107)                                              | 80 (70)                                                                | 72 (55)                      | 103 (75)                     | 99 (74)                          | 103 (81)                           |

Type of VHA facility is the site of the first primary care clinic visit between January 1<sup>st</sup> 2019 to December 31<sup>st</sup> 2020 (community-based outpatient center, VHA medical center, or other) and the driving time in minutes to the nearest VHA tertiary center from the patient's address.

**eTable 6.** Association of race and ethnicity categories with SGLT2i and GLP1-RA prescription with further adjustment for VHA facility type and driving time to tertiary care VHA center

|                                                  | <b>SGLT2i</b>                              | <b>GLP1-RA</b>                             |
|--------------------------------------------------|--------------------------------------------|--------------------------------------------|
|                                                  | <b>Multivariable Model<br/>OR (95% CI)</b> | <b>Multivariable model<br/>OR (95% CI)</b> |
| <b>Race</b>                                      |                                            |                                            |
| White                                            | <b>Reference</b>                           | <b>Reference</b>                           |
| American Indian or Alaska Native                 | 0.85 (0.79, 0.91)                          | 0.89 (0.82,0.97)                           |
| Asian, Native Hawaiian or Other Pacific Islander | 0.95 (0.91, 1.0)                           | 0.80 (0.75,0.85)                           |
| Black                                            | 0.72 (0.70, 0.73)                          | 0.63 (0.62,0.65)                           |
| Multiracial                                      | 0.87 (0.82, 0.94)                          | 0.90 (0.83,0.97)                           |
| Unknown                                          | 0.92 (0.90, 0.95)                          | 0.87 (0.84,0.91)                           |
| <b>Ethnicity</b>                                 |                                            |                                            |
| Not Hispanic or Latino                           | <b>Reference</b>                           | <b>Reference</b>                           |
| Hispanic or Latino                               | 0.90 (0.88, 0.93)                          | 0.88 (0.85,0.91)                           |
| Unknown ethnicity                                | 0.98 (0.95, 1.02)                          | 1.03 (0.98,1.08)                           |
| <b>Type of VHA facility</b>                      |                                            |                                            |
| VHA medical center                               | <b>Reference</b>                           | <b>Reference</b>                           |
| Community based outpatient clinic                | 0.98 (0.96, 0.99)                          | 0.95 (0.93, 0.96)                          |
| Other                                            | 0.97 (0.94, 1.00)                          | 1.07 (1.03, 1.10)                          |
| <b>Driving time to tertiary VHA facility</b>     |                                            |                                            |
| Q1 (0-34 minutes)                                | <b>Reference</b>                           | <b>Reference</b>                           |
| Q2 (35-81 minutes)                               | 0.94 (0.92, 0.96)                          | 0.94 (0.92, 0.97)                          |
| Q3 (82-133 minutes)                              | 0.94 (0.91, 0.96)                          | 0.89 (0.86, 0.92)                          |
| Q4 (>133 minutes)                                | 1.03 (1.00, 1.06)                          | 0.87 (0.84, 0.91)                          |

Type of VHA facility is the site of the first primary care clinic visit between January 1<sup>st</sup> 2019 to December 31<sup>st</sup> 2020 (community-based outpatient center, VHA medical center, or other) and the driving time in minutes to the nearest VHA tertiary center from the patient's address.

Multivariable models adjusted for demographic factors, Zip Code median income, Zip Code social deprivation index, VHA diabetes and service connection, rurality, smoking status, unhealthy alcohol use, hemoglobin A1C, other anti-diabetic agents, hypertension, body mass index, mental health diagnosis, ASCVD, heart failure, no CKD, CKD: estimated GFR and albuminuria categories, number of primary care, cardiology, endocrinology, and nephrology visits, VHA frailty index, COVID-19 diagnosis, VHA station parent facility-complexity level, United States Census Division, Type of VHA facility, and Driving Time to tertiary VHA facility.



**eTable 7.** Association of race and ethnicity with SGLT2i and GLP1-RA prescription restricting study sample to patients with at least two prescription fills during in one year

|                                                  | <b>SGLT2i</b>                              | <b>GLP1-RA</b>                             |
|--------------------------------------------------|--------------------------------------------|--------------------------------------------|
|                                                  | <b>Multivariable Model<br/>OR (95% CI)</b> | <b>Multivariable model<br/>OR (95% CI)</b> |
| <b>Race</b>                                      |                                            |                                            |
| White                                            | <b>Reference</b>                           | <b>Reference</b>                           |
| American Indian or Alaska Native                 | 0.81 (0.75,0.88)                           | 0.90 (0.82,0.98)                           |
| Asian, Native Hawaiian or Other Pacific Islander | 0.94 (0.89,0.99)                           | 0.81 (0.76,0.86)                           |
| Black                                            | 0.67 (0.66,0.69)                           | 0.63 (0.62,0.65)                           |
| Multiracial                                      | 0.85 (0.79, 0.92)                          | 0.87 (0.8,0.95)                            |
| Unknown                                          | 0.9 (0.87,0.93)                            | 0.84 (0.81,0.88)                           |
| <b>Ethnicity</b>                                 |                                            |                                            |
| Not Hispanic or Latino                           | <b>Reference</b>                           | <b>Reference</b>                           |
| Hispanic or Latino                               | 0.87 (0.84, 0.90)                          | 0.88 (0.85,0.92)                           |
| Unknown ethnicity                                | 0.98 (0.94,1.03)                           | 1.04 (0.98,1.09)                           |

Multivariable models adjusted for demographic factors, Zip Code median income, Zip Code social deprivation index, VHA diabetes and service connection, rurality, smoking status, unhealthy alcohol use, hemoglobin A1C, other anti-diabetic agents, hypertension, body mass index, mental health diagnosis, ASCVD, heart failure, no CKD, CKD: estimated GFR and albuminuria categories, number of primary care, cardiology, endocrinology, and nephrology visits, VHA frailty index, COVID-19 diagnosis, VHA station parent facility-complexity level, United States Census Division, Type of VHA facility, and Driving Time to tertiary VHA facility.

**eTable 8.** Incident prescription rates for SGLT2i from 2017 to 2021

| Race Category                                    | April-October 2017             |                                   | April-October 2019            |                                   | April-October 2021            |                                   |
|--------------------------------------------------|--------------------------------|-----------------------------------|-------------------------------|-----------------------------------|-------------------------------|-----------------------------------|
|                                                  | SLGLT2i incident rate (95% CI) | Incident rate difference (95% CI) | SGLT2i incident rate (95% CI) | Incident rate difference (95% CI) | SGLT2i incident rate (95% CI) | Incident rate difference (95% CI) |
| White                                            | 0.42<br>(0.41,0.44)            | <b>Reference</b>                  | 1.60<br>(1.55,1.64)           | <b>Reference</b>                  | 3.53<br>(3.44,3.61)           | <b>Reference</b>                  |
| American Indian or Alaska Native                 | 0.32<br>(0.21,0.48)            | -0.29 (-0.71,0.13)                | 1.39<br>(1.15,1.67)           | -0.14 (-0.33,0.04)                | 3 (2.63,3.42)                 | -0.16 (-0.29,-0.03)               |
| Asian, Native Hawaiian or Other Pacific Islander | 0.61<br>(0.5,0.75)             | 0.37 (0.16,0.57)                  | 1.67<br>(1.49,1.87)           | 0.04 (-0.07,0.15)                 | 3.33<br>(3.07,3.61)           | -0.06 (-0.14,0.02)                |
| Black or African American                        | 0.29<br>(0.27,0.32)            | -0.38 (-0.47,-0.28)               | 1.11<br>(1.06,1.16)           | -0.37 (-0.41,-0.32)               | 2.65<br>(2.56,2.74)           | -0.29 (-0.32,-0.26)               |
| Multiracial                                      | 0.47<br>(0.33,0.66)            | 0.1 (-0.25,0.44)                  | 1.53<br>(1.28,1.84)           | -0.04 (-0.22,0.14)                | 3.19<br>(2.8,3.63)            | -0.1 (-0.23,0.03)                 |
| Unknown                                          | 0.36<br>(0.3,0.42)             | -0.18 (-0.34,-0.01)               | 1.47<br>(1.36,1.58)           | -0.09 (-0.16,-0.01)               | 3.25<br>(3.08,3.42)           | -0.08 (-0.14,-0.03)               |
| <b>Ethnicity</b>                                 |                                |                                   |                               |                                   |                               |                                   |
| Not Hispanic or Latino                           | 0.40<br>(0.38,0.41)            | <b>Reference</b>                  | 1.45<br>(1.41,1.49)           | <b>Reference</b>                  | 3.26<br>(3.18,3.34)           | <b>Reference</b>                  |
| Hispanic or Latino                               | 0.3<br>(0.26,0.34)             | -0.29 (-0.44,-0.14)               | 1.6 (1.51,1.7)                | 0.10 (0.04,0.16)                  | 3.12<br>(2.97,3.27)           | -0.05 (-0.09,0)                   |
| Unknown ethnicity                                | 0.33<br>(0.27,0.41)            | -0.17 (-0.39,0.04)                | 1.42<br>(1.28,1.57)           | -0.02 (-0.12,0.08)                | 3.18<br>(2.97,3.41)           | -0.03 (-0.09,0.04)                |

Rates are per 100 patients with type 2 diabetes not previously prescribed an SLGT2i in the previous interval with marginal estimates averaged over age, sex, and race and ethnicity  
 Rate differences are adjusted for time-period, age, sex, and race and ethnicity

**eTable 9.** Incident prescription rates for GLP1-RA from 2017 to 2021

| Race Category                                    | April-October 2017             |                                   | April-October 2019            |                                   | April-October 2021            |                                   |
|--------------------------------------------------|--------------------------------|-----------------------------------|-------------------------------|-----------------------------------|-------------------------------|-----------------------------------|
|                                                  | SLGLT2i incident rate (95% CI) | Incident rate difference (95% CI) | SGLT2i incident rate (95% CI) | Incident rate difference (95% CI) | SGLT2i incident rate (95% CI) | Incident rate difference (95% CI) |
| White                                            | 0.69<br>(0.66,0.72)            | <b>Reference</b>                  | 1.42<br>(1.38,1.46)           | <b>Reference</b>                  | 2.17<br>(2.11,2.23)           | <b>Reference</b>                  |
| American Indian or Alaska Native                 | 0.49<br>(0.34,0.69)            | -0.35 (-0.7,0)                    | 1.14<br>(0.93,1.4)            | -0.22 (-0.42,-0.01)               | 1.59<br>(1.34,1.89)           | -0.31 (-0.48,-0.14)               |
| Asian, Native Hawaiian or Other Pacific Islander | 0.71<br>(0.58,0.86)            | 0.03 (-0.17,0.22)                 | 1.24<br>(1.09,1.41)           | -0.13 (-0.26,-0.01)               | 1.58<br>(1.42,1.76)           | -0.32 (-0.42,-0.21)               |
| Black or African American                        | 0.45<br>(0.42,0.49)            | -0.42 (-0.5,-0.34)                | 0.93<br>(0.88,0.97)           | -0.43 (-0.48,-0.38)               | 1.42<br>(1.36,1.48)           | -0.43 (-0.47,-0.39)               |
| Multiracial                                      | 0.69<br>(0.51,0.92)            | 0 (-0.29,0.29)                    | 1.45<br>(1.2,1.74)            | 0.02 (-0.17,0.21)                 | 2.09<br>(1.8,2.44)            | -0.04 (-0.19,0.12)                |
| Unknown                                          | 0.59<br>(0.52,0.67)            | -0.16 (-0.29,-0.03)               | 1.18<br>(1.09,1.29)           | -0.18 (-0.27,-0.09)               | 1.8<br>(1.68,1.92)            | -0.19 (-0.26,-0.12)               |
| <b>Ethnicity</b>                                 |                                |                                   |                               |                                   |                               |                                   |
| Not Hispanic or Latino                           | 0.40<br>(0.38,0.41)            | <b>Reference</b>                  | 1.45<br>(1.41,1.49)           | <b>Reference</b>                  | 3.26<br>(3.18,3.34)           | <b>Reference</b>                  |
| Hispanic or Latino                               | 0.3<br>(0.26,0.34)             | -0.29 (-0.44,-0.14)               | 1.6 (1.51,1.7)                | 0.10 (0.04,0.16)                  | 3.12<br>(2.97,3.27)           | -0.05 (-0.09,0)                   |
| Unknown ethnicity                                | 0.33<br>(0.27,0.41)            | -0.17 (-0.39,0.04)                | 1.42<br>(1.28,1.57)           | -0.02 (-0.12,0.08)                | 3.18<br>(2.97,3.41)           | -0.03 (-0.09,0.04)                |

Rates are per 100 patients with type 2 diabetes not previously prescribed a GLP1-RA in the previous interval with marginal estimates averaged over age, sex, race and ethnicity

Rate differences are adjusted for time-period, age, sex, race, and ethnicity group

**eFigure 1.** Algorithm for ascertainment of type 2 diabetes in electronic health records

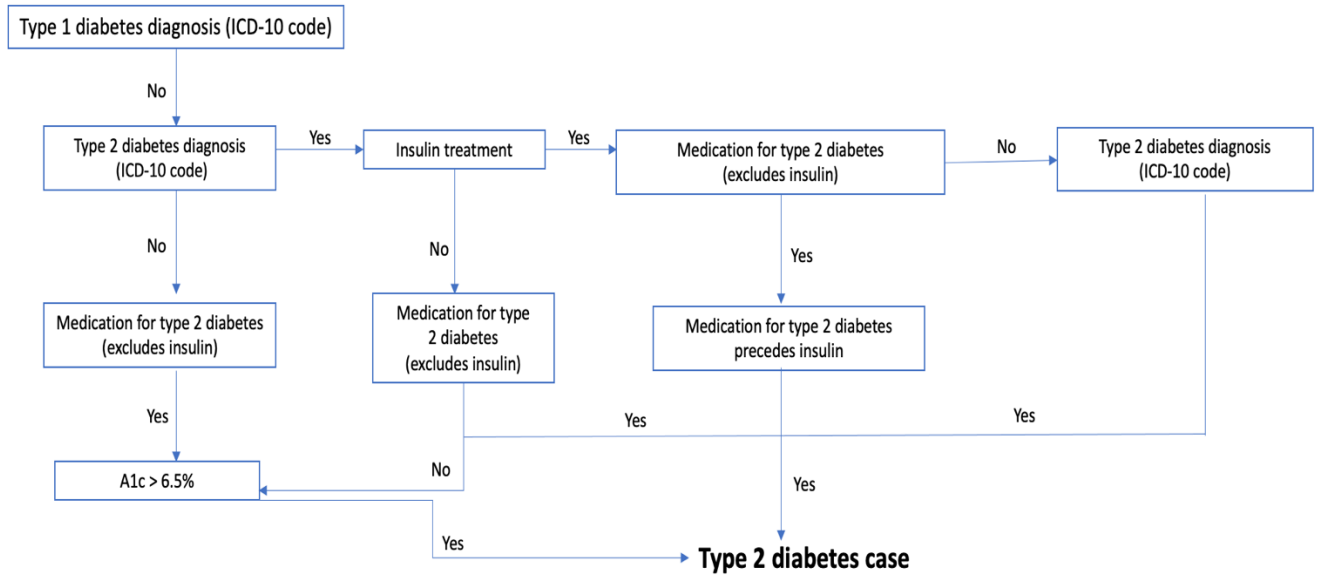

A type 2 diabetes case requires ICD-10 codes for type 2 diabetes on at least two separate outpatient clinical encounters. Based on eMERGE algorithm for ascertainment of type 2 diabetes cases and controls in electronic health records<sup>11,13</sup>. Original eMERGE used ICD-9 codes and use glucose levels in addition to A1C concentrations.

**eFigure 2.** Identification of the study sample

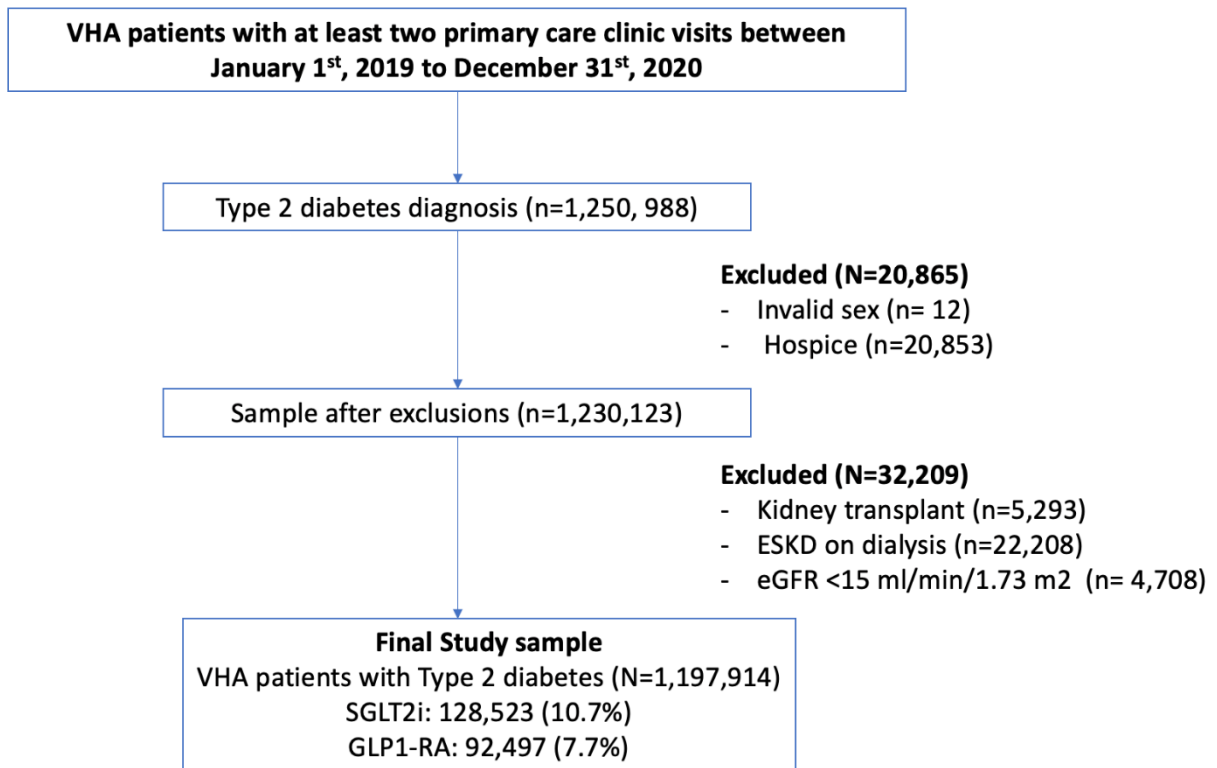

**eFigure 3.** Association between race and ethnicity groups and SGLT2i prescription with sequential adjustment for patient and system-level characteristics

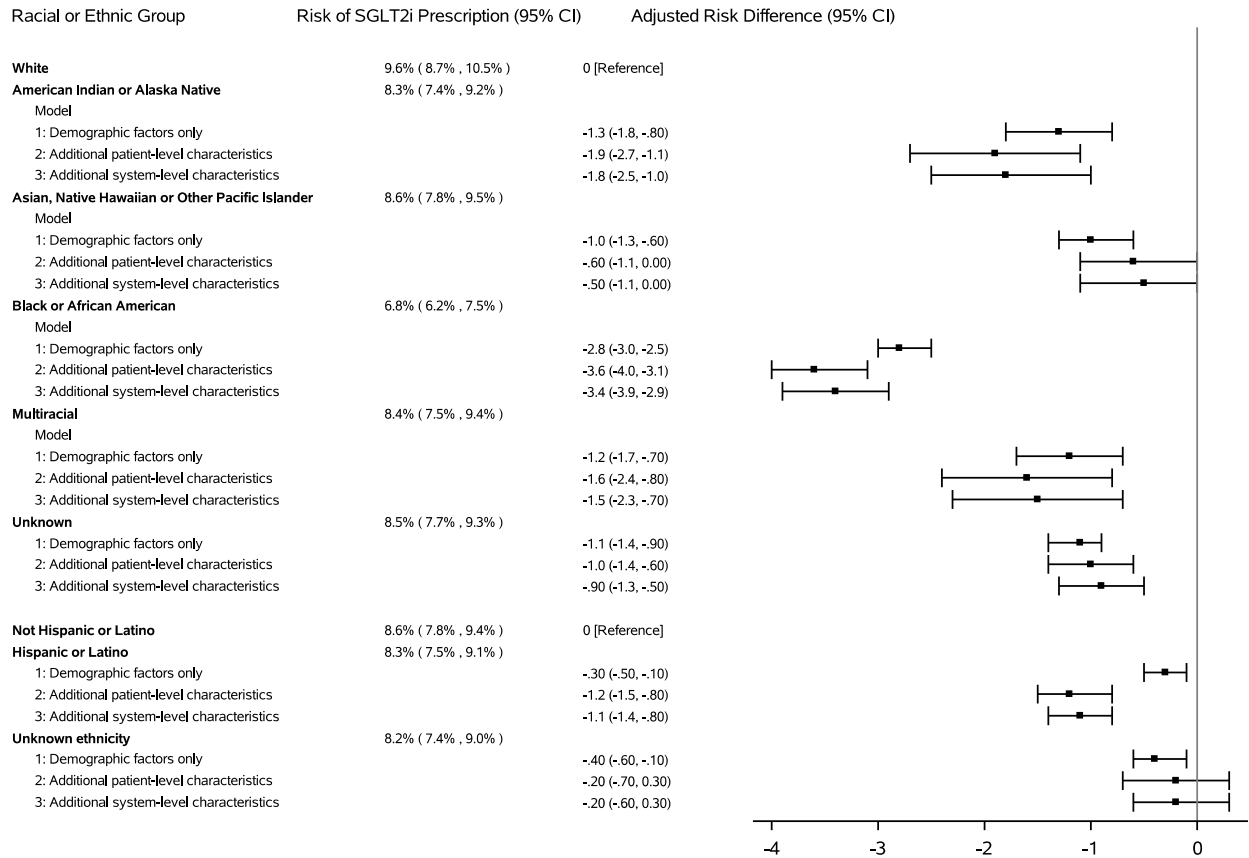

Demographic factors only: age, sex, self-identified race and ethnicity  
 Additional patient-level characteristics: include demographic factors and Zip Code median income, Zip Code social deprivation index, VHA diabetes and service connection, rurality, smoking status, unhealthy alcohol use, hemoglobin A1C, other anti-diabetic agents, hypertension, body mass index, mental health diagnosis, ASCVD, heart failure, no CKD, CKD: estimated GFR and albuminuria categories, number of primary care, cardiology, endocrinology, and nephrology visits, VHA frailty index, COVID-19 diagnosis.  
 Additional system-level characteristics: VHA station parent facility-complexity level, United States Census Division.

**eFigure 4.** Association between race and ethnicity groups and GLP1-RA prescription with sequential adjustment for patient and system-level characteristics

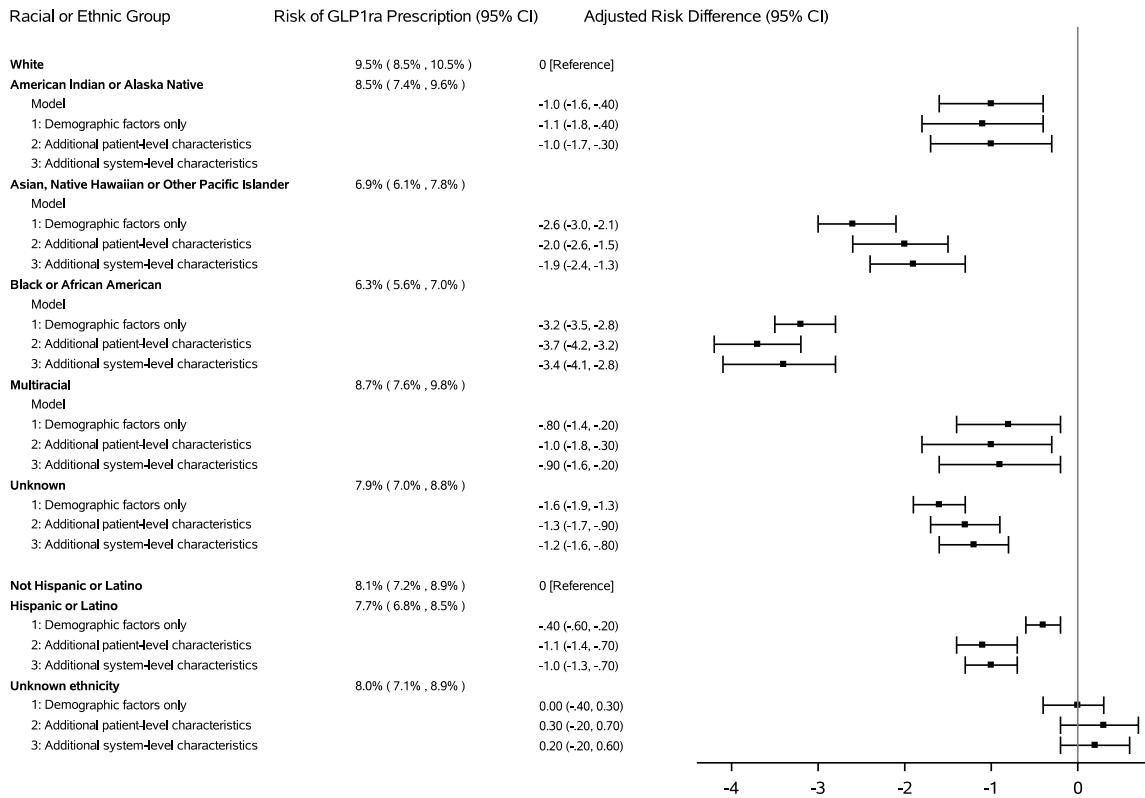

Demographic factors only: age, sex, self-identified race and ethnicity  
 Additional patient-level characteristics: include demographic factors and Zip Code median income, Zip Code social deprivation index, VHA diabetes and service connection, rurality, smoking status, unhealthy alcohol use, hemoglobin A1C, other anti-diabetic agents, hypertension, body mass index, mental health diagnosis, ASCVD, heart failure, no CKD, CKD: estimated GFR and albuminuria categories, number of primary care, cardiology, endocrinology, and nephrology visits, VHA frailty index, COVID-19 diagnosis.  
 Additional system-level characteristics: VHA station parent facility-complexity level, United States Census Division.

**eFigure 5.** Variability in SGLT2i prescription across VHA stations

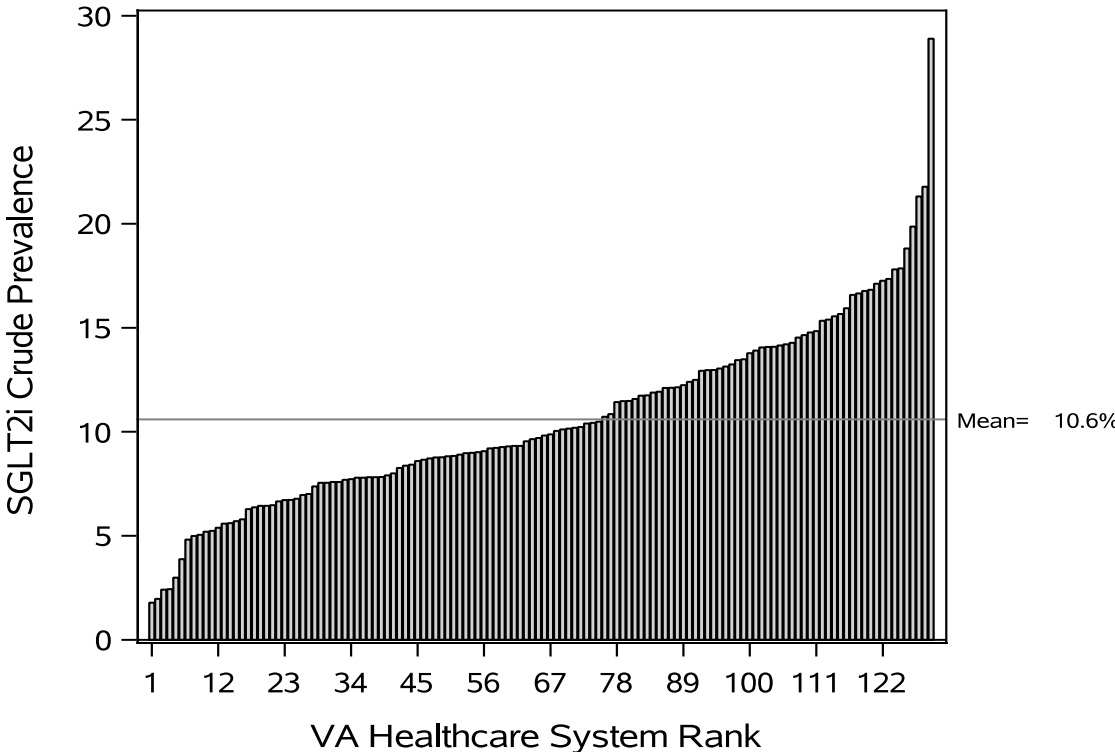



**eFigure 6.** Variability in GLP1-RA prescription across VHA stations

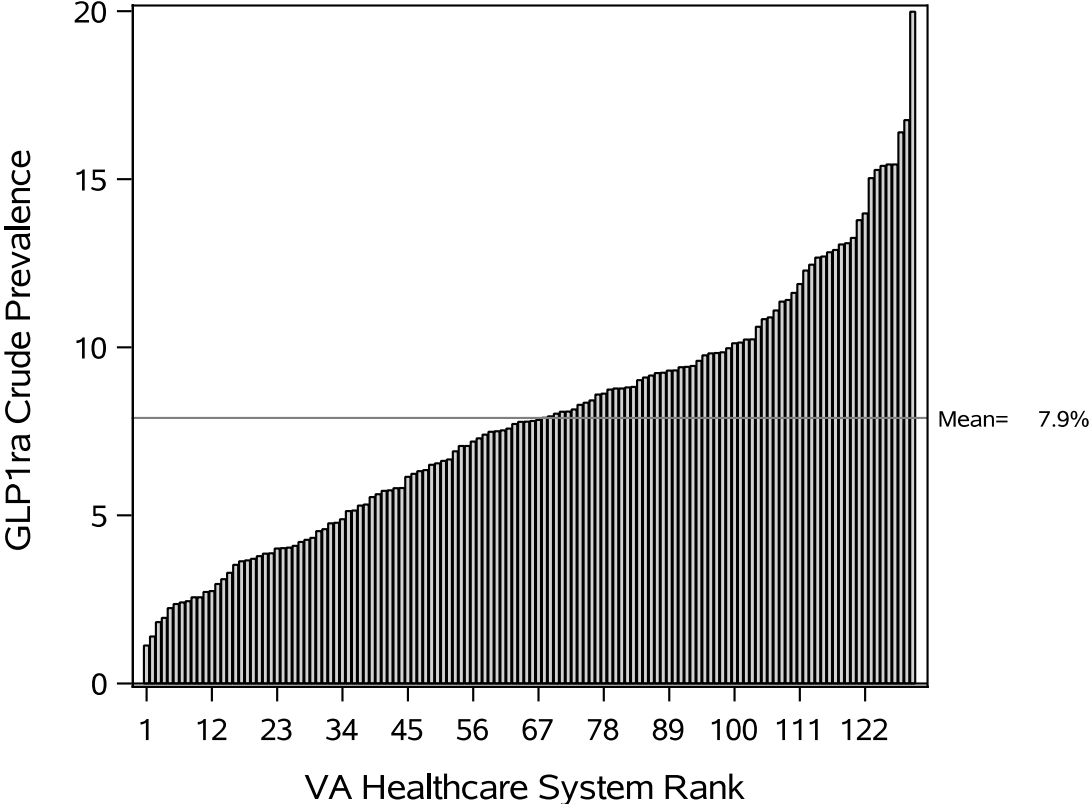

**eFigure 7.** Prescription of SGLT2i and GLP1-RA comparing American Indian or Alaska Native patients versus White patients across patient- and system-level characteristics

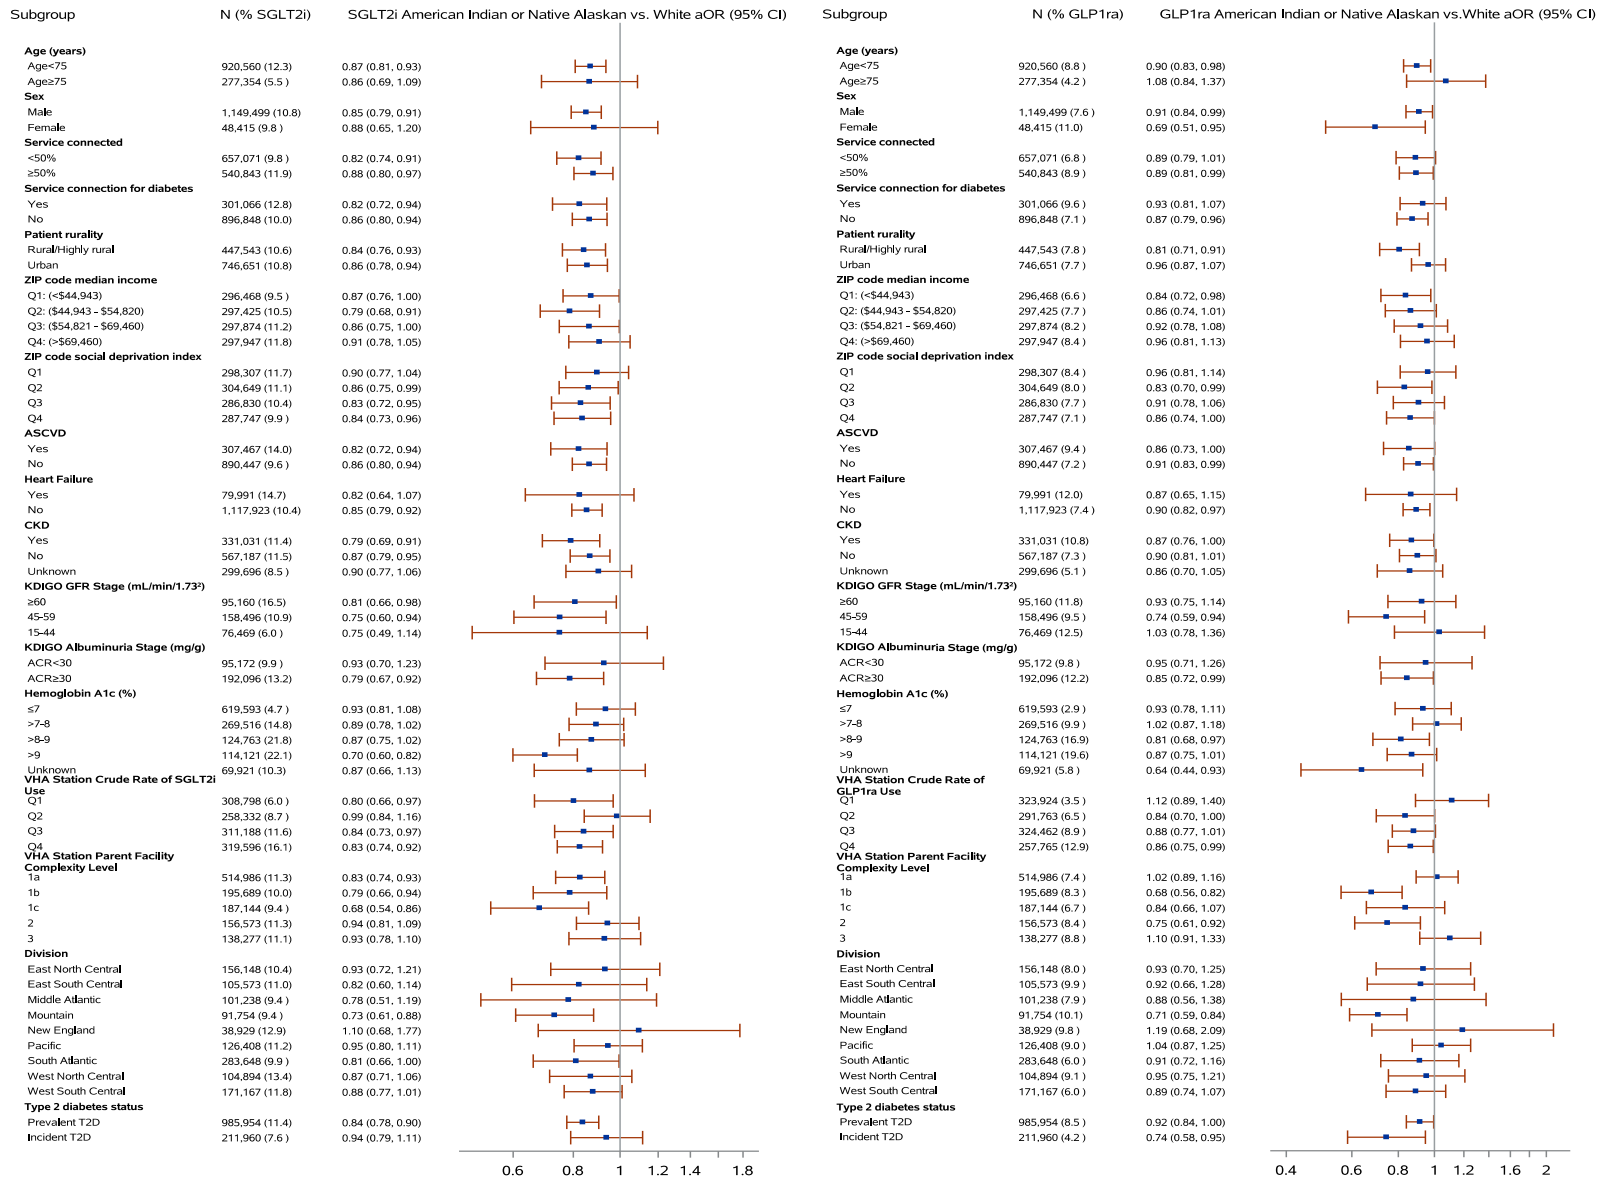

Multivariable models adjusted for demographic factors, Zip Code median income, Zip Code social deprivation index, VHA diabetes and service connection, rurality, smoking status, unhealthy alcohol use, hemoglobin A1C, other anti-diabetic agents, hypertension, body mass index, mental health diagnosis, ASCVD, heart failure, no CKD, CKD: estimated GFR and albuminuria categories, number of primary care, cardiology, endocrinology, and nephrology visits, VHA frailty index, COVID-19 diagnosis, VHA station parent facility-complexity level, United States Census Division. Abbreviations: ASCVD, atherosclerotic cardiovascular disease; CKD, chronic kidney disease; KDIGO, Kidney Disease Improving Global Outcomes CKD classification, T2D, type 2 diabetes. Prevalent T2D includes patients with a diagnosis of type 2 diabetes before January 1<sup>st</sup>, 2019. Incident T2D includes patients with a diagnosis of type 2 diabetes between January 1<sup>st</sup> 2019 to December 31<sup>st</sup> 2020.

**eFigure 8.** Prescription of SGLT2i and GLP1-RA comparing Asian, Native Hawaiian or Other Pacific Islander patients versus White patients across patient- and system-level characteristics

Multivariable models adjusted for demographic factors, Zip Code median income, Zip Code social deprivation index, VHA diabetes and service connection, rurality, smoking status, unhealthy alcohol use, hemoglobin A1C, other anti-diabetic agents, hypertension, body mass index, mental health diagnosis, ASCVD, heart failure, no CKD, CKD: estimated GFR and albuminuria categories, number of primary care, cardiology, endocrinology, and nephrology visits, VHA frailty index, COVID-19 diagnosis, VHA station parent facility-complexity level, United States Census Division. Abbreviations: ASCVD, atherosclerotic cardiovascular disease; CKD, chronic kidney disease; KDIGO, Kidney Disease Improving Global Outcomes CKD classification, T2D, type 2 diabetes. Prevalent T2D includes patients with a diagnosis of type 2 diabetes before January 1<sup>st</sup>,

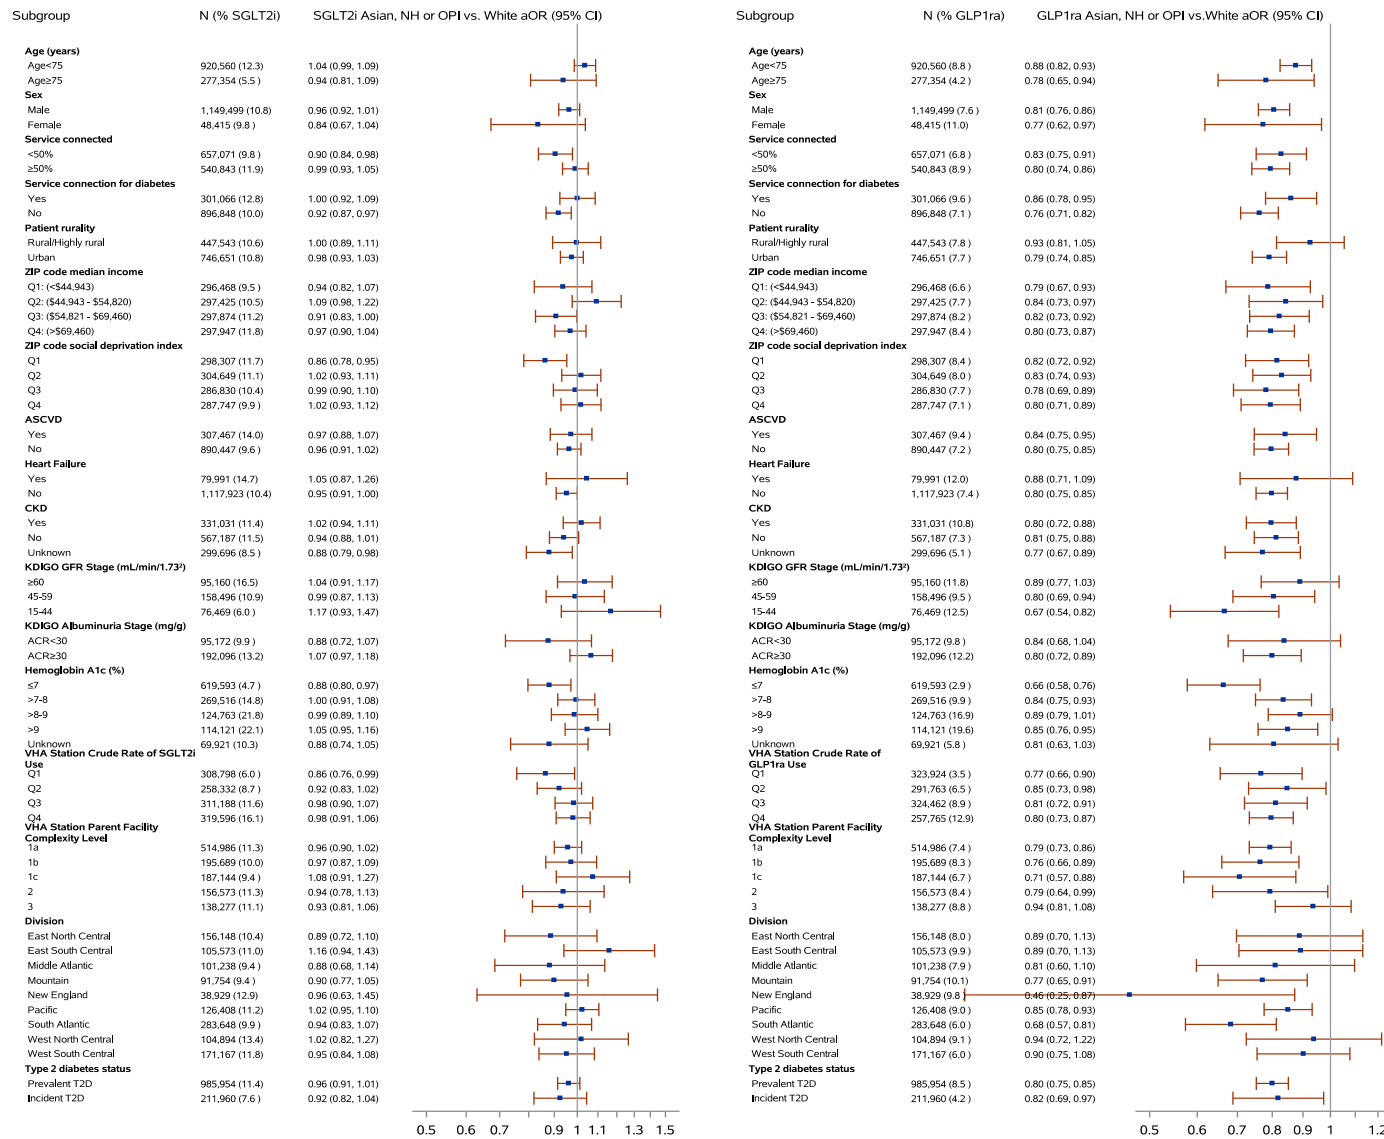

2019. Incident T2D includes patients with a diagnosis of type 2 diabetes between January 1<sup>st</sup> 2019 to December 31<sup>st</sup> 2020.

**eFigure 9.** Prescription of SGLT2i and GLP1-RA comparing Multiracial patients versus White patients across patient- and system-level characteristics

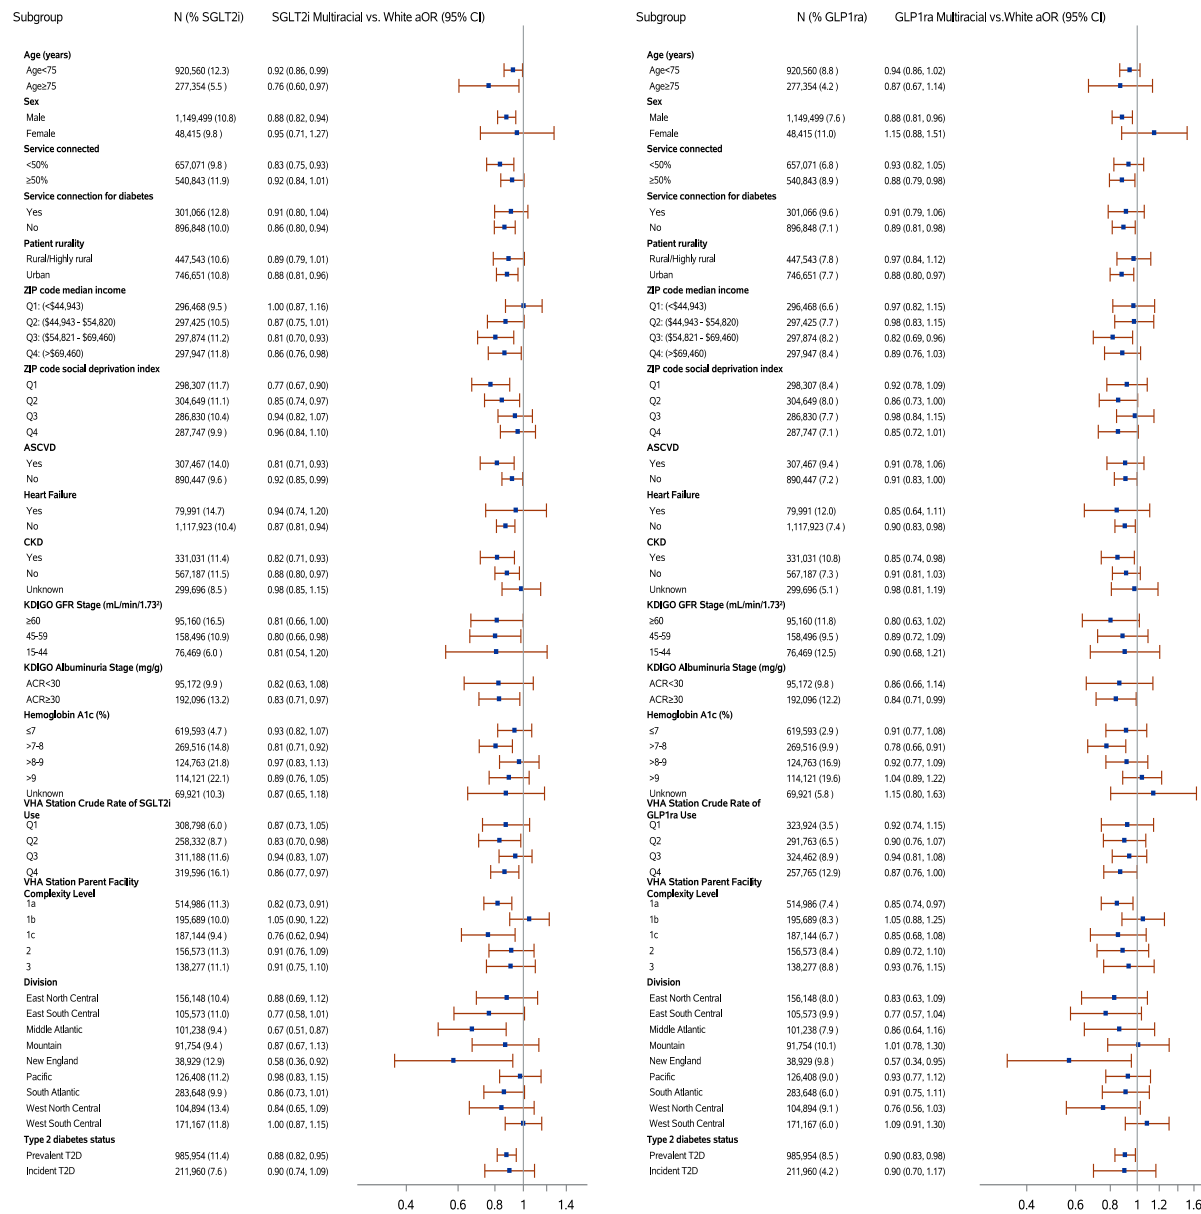

Multivariable models adjusted for demographic factors, Zip Code median income, Zip Code social deprivation index, VHA diabetes and service connection, rurality, smoking status, unhealthy alcohol use, hemoglobin A1C, other anti-diabetic agents, hypertension, body mass index, mental health diagnosis, ASCVD, heart failure, no CKD, CKD: estimated GFR and albuminuria categories, number of primary care, cardiology, endocrinology, and nephrology visits, VHA frailty index, COVID-19 diagnosis, VHA station parent facility-complexity level, United States Census Division.

Abbreviations: ASCVD, atherosclerotic cardiovascular disease; CKD, chronic kidney disease; KDIGO, Kidney Disease Improving Global Outcomes CKD classification, T2D, type 2 diabetes.

Prevalent T2D includes patients with a diagnosis of type 2 diabetes before January 1<sup>st</sup>, 2019. Incident T2D includes patients with a diagnosis of type 2 diabetes between January 1<sup>st</sup> 2019 to December 31<sup>st</sup> 2020.

**eFigure 10.** Prescription of SGLT2i and GLP1-RA comparing patients with Unknown race versus White patients across patient- and system-level characteristics

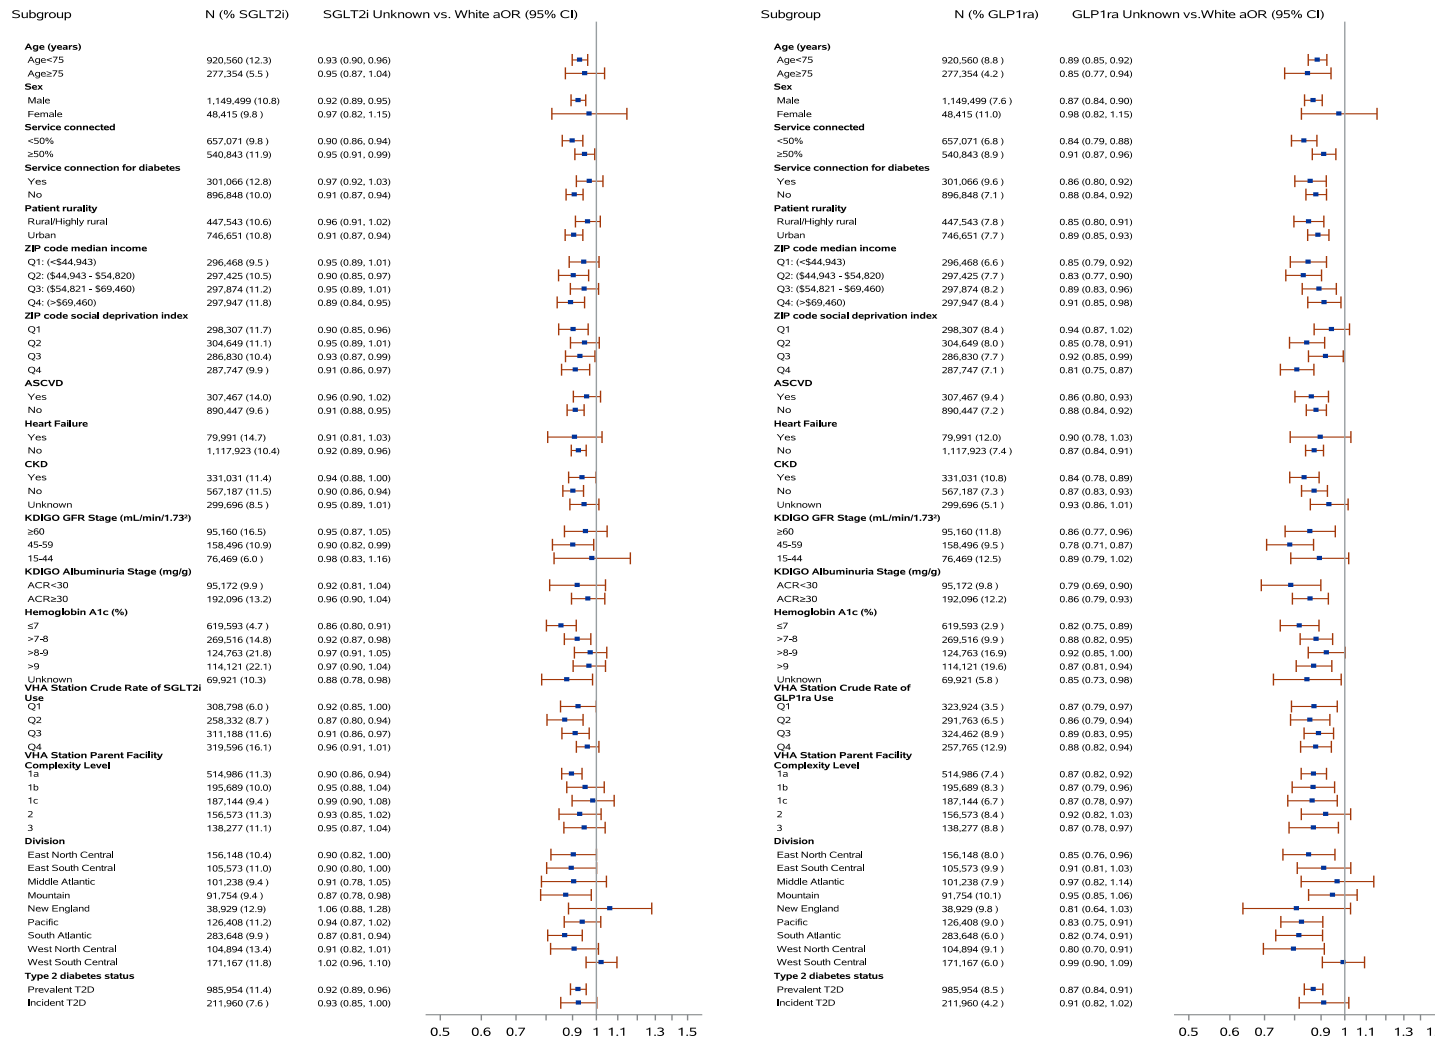

Multivariable models adjusted for demographic factors, Zip Code median income, Zip Code social deprivation index, VHA diabetes and service connection, rurality, smoking status, unhealthy alcohol use, hemoglobin A1C, other anti-diabetic agents, hypertension, body mass index, mental health diagnosis, ASCVD, heart failure, no CKD, CKD: estimated GFR and albuminuria categories, number of primary care, cardiology, endocrinology, and nephrology visits, VHA frailty index, COVID-19 diagnosis, VHA station parent facility-complexity level, United States Census Division. Abbreviations: ASCVD, atherosclerotic cardiovascular disease; CKD, chronic kidney disease; KDIGO, Kidney Disease Improving Global Outcomes CKD classification, T2D, type 2 diabetes. Prevalent T2D includes patients with a diagnosis of type 2 diabetes before January 1<sup>st</sup>, 2019. Incident T2D includes patients with a diagnosis of type 2 diabetes between January 1<sup>st</sup> 2019 to December 31<sup>st</sup> 2020.

**eFigure 11.** Incident prescription rates for SGLT2i from 2017 to 2021 across race groups

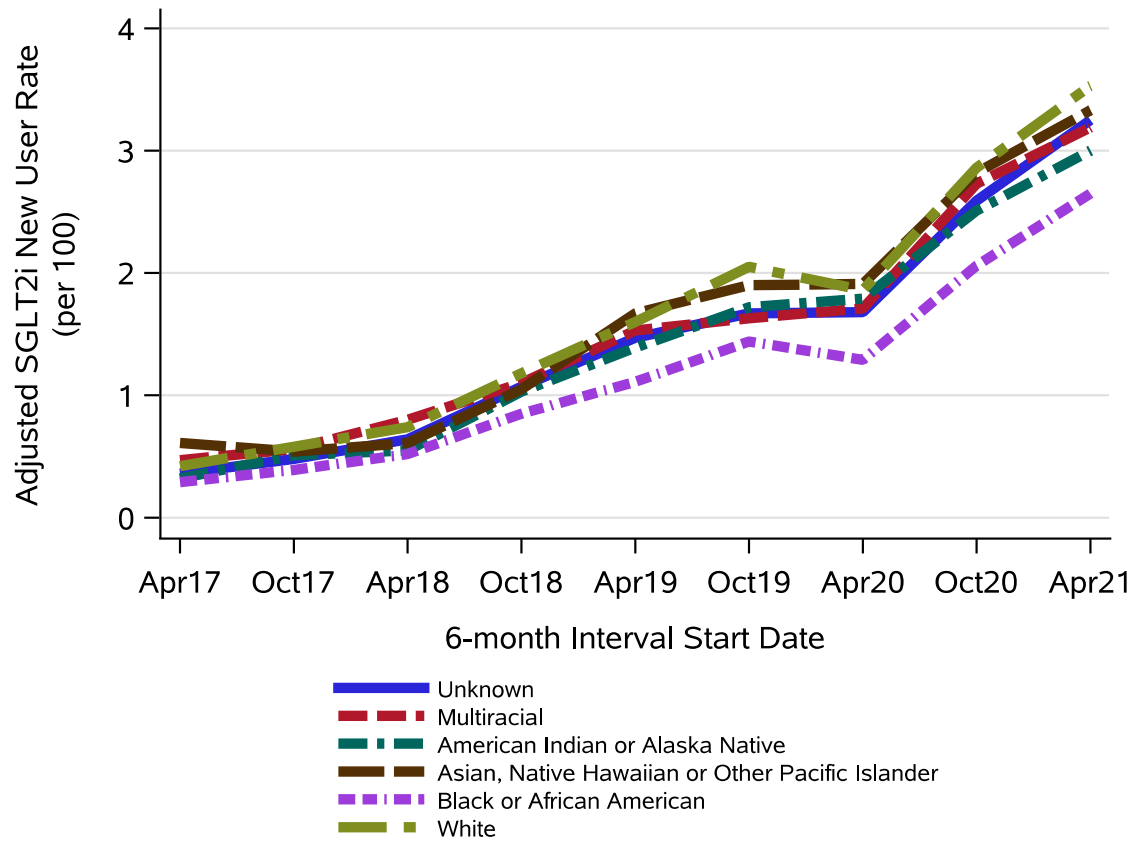

Rates are per 100 patients with type 2 diabetes not previously prescribed a GLP1-RA in the previous interval with marginal estimates averaged over age, sex, race and ethnicity

**eFigure 12.** Incident prescription rates for SGLT2i from 2017 to 2021 across ethnicity groups

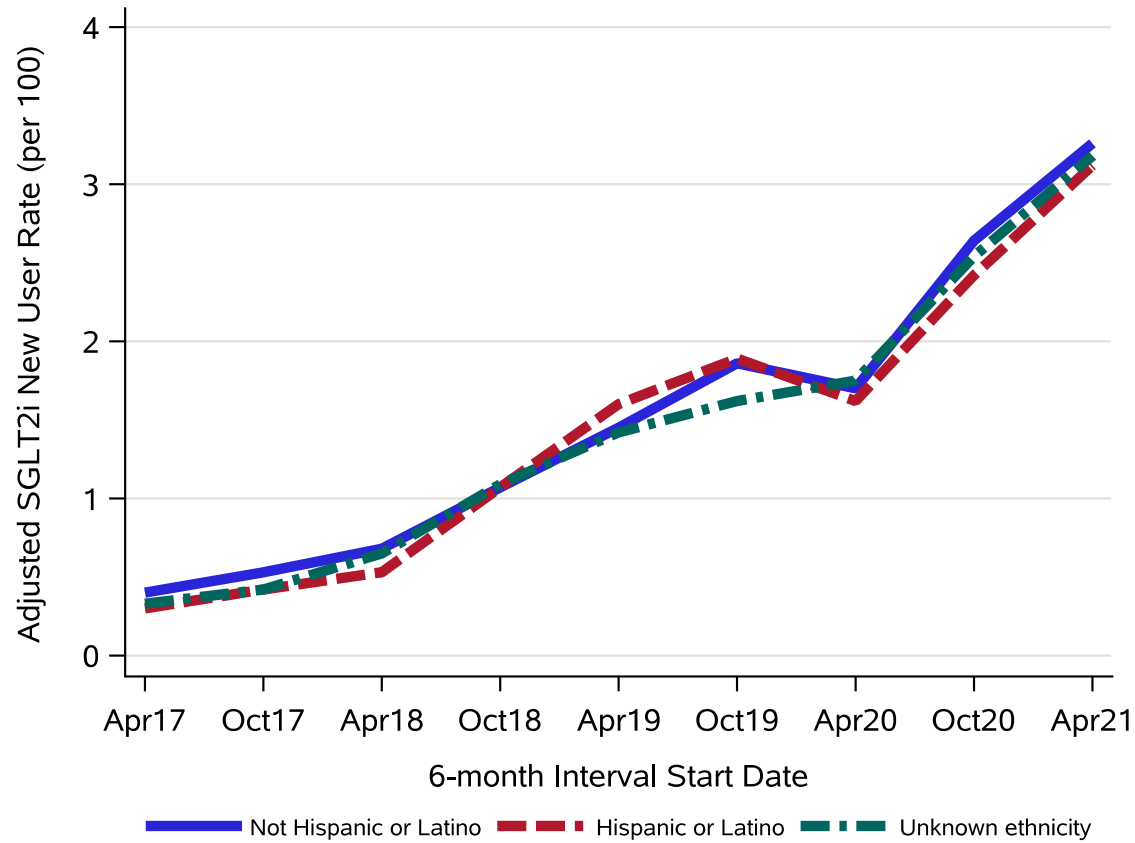

Rates are per 100 patients with type 2 diabetes not previously prescribed a GLP1-RA in the previous interval with marginal estimates averaged over age, sex, race and ethnicity

**eFigure 13.** Incident prescription rates for GLP1-RA from 2017 to 2021 across race groups

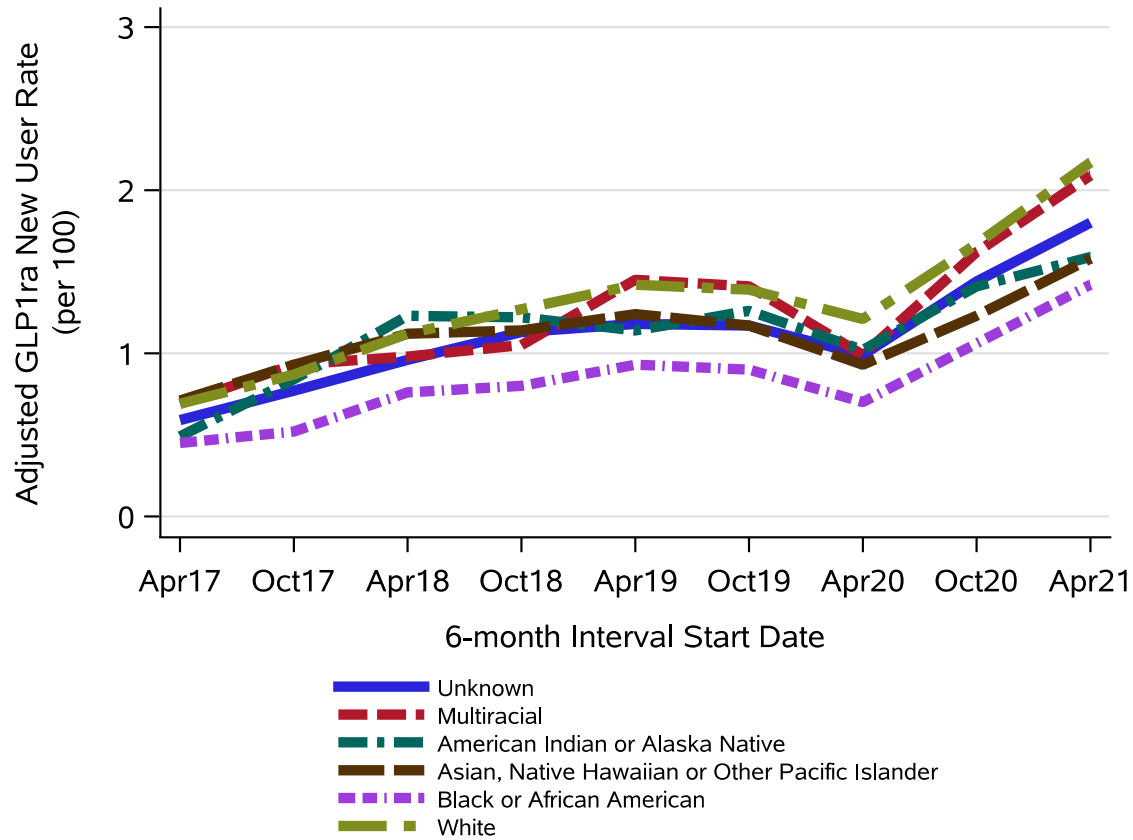

Rates are per 100 patients with type 2 diabetes not previously prescribed a GLP1-RA in the previous interval with marginal estimates averaged over age, sex, race and ethnicity



**eFigure 14.** Incident prescription rates for GLP1-RA from 2017 to 2021 across ethnicity groups

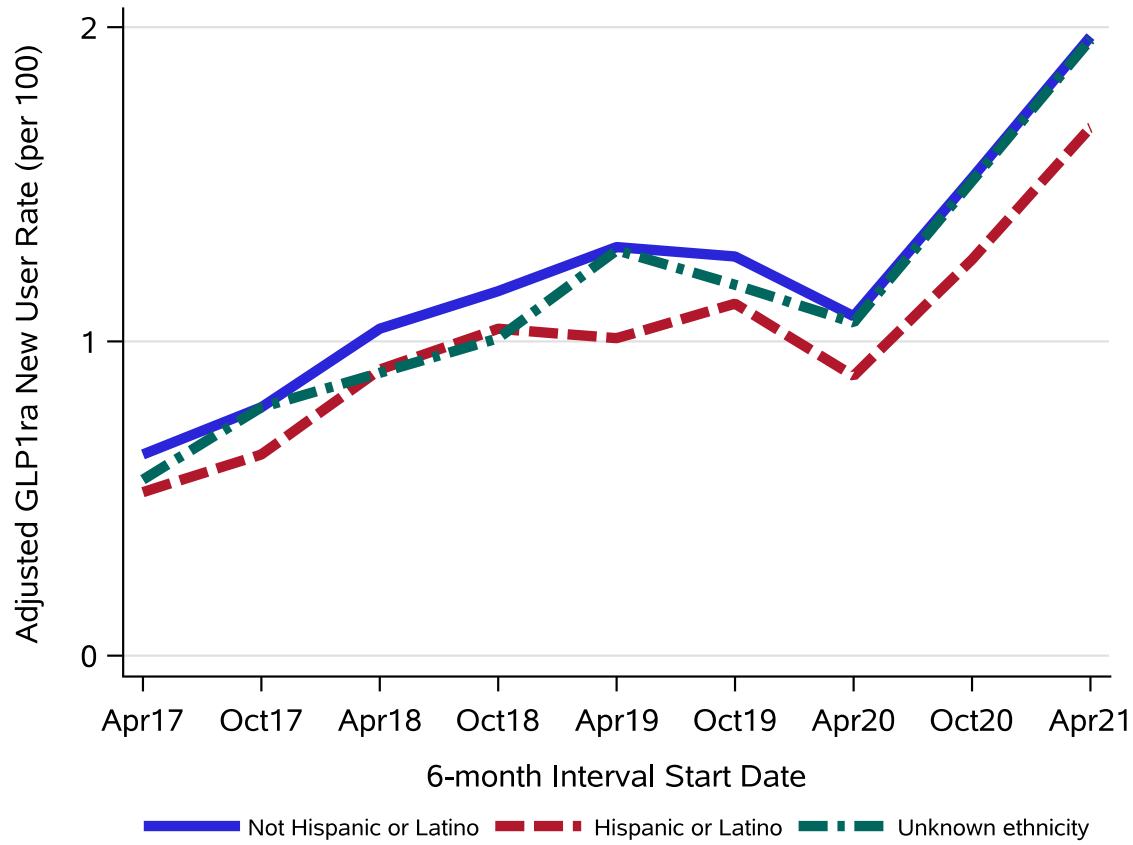

Rates are per 100 patients with type 2 diabetes not previously prescribed a GLP1-RA in the previous interval with marginal estimates averaged over age, sex, race and ethnicity

## eAppendix. Sensitivity analyses

Multiple sensitivity analyses were conducted. First, we conducted multivariable regression analyses adding an indicator variable to identify the site of the first primary care clinic visit within the study period (community-based outpatient center, VHA medical center, or other) and the driving time in minutes to the nearest VHA tertiary center from the patient's address. Second, the analyses were restricted to patients that had at least 2 prescription fills for SGLT2i and GLP1-RA prescription in a single year: January 1<sup>st</sup> 2019 to December 31<sup>st</sup> 2019. Third, because the prescription analyses combined prevalent and incident prescriptions, we conducted analyses for trends in incident prescription across race and ethnicity groups. For every 6-month-interval between April 1<sup>st</sup>, 2017, through April 30<sup>th</sup>, 2021, we assessed new SGLT2i and GLP1-RA prescriptions defined as new prescriptions within the interval and absence of prescriptions in the 18-month period prior<sup>14</sup>. Fourth, to assess the influence of system-level differences in racial composition across facilities, we included a VHA station specific race percentage to the multilevel models<sup>15</sup>. We assessed whether the association of an individual's race with prescription differed by the racial composition of the VHA station by including an interaction term between individual's race and VHA station-level percentage of a given racial category.

## Results

Analyses that included the type of VHA facility and the driving time to a tertiary VHA facility are presented in **Supplement eTables 4 and 5**.

Analyses that restricted the outcome to at least two prescription fills per year are presented in **Supplement eTable 6**. Results were consistent with the main findings.

Analyses that assessed incident prescriptions of SGLT2i and GLP1-RA prescriptions demonstrated that they have increased for all racial and ethnic groups (**Supplement eTables 7 and 8 and eFigures 12-14**). Differences in the racial composition across facilities were not associated with statistically significant differences of SGLT2i or GLP1-RA prescription; VHA station-specific proportion of Black race individuals was not associated with prevalence of these prescriptions, independent of individual patient race: adjusted odds ratio (95% CI) 0.99 (0.99, 1.01) for SGLT2i

and 1.00 (0.99, 1.01) for GLP1-RA. For SGLT2i, the association of an individual's race with prescription did not significantly differ by the racial composition of the facility ( $p=0.398$  for interaction between race category and station-level racial composition); conversely, a Black individual had lower likelihood of GLP1-RA prescription within a facility comprising higher versus lower percentage of Black patients ( $p=0.023$ ).

## eReferences

1. Council NR, Others. *Using the American Community Survey: Benefits and Challenges*. National Academies Press; 2007.
2. Butler DC, Petterson S, Phillips RL, Bazemore AW. Measures of social deprivation that predict health care access and need within a rational area of primary care service delivery. *Health Serv Res*. 2013;48(2 Pt 1):539-559.
3. Hall SA, Kaufman JS, Ricketts TC. Defining urban and rural areas in U.S. epidemiologic studies. *J Urban Health*. 2006;83(2):162-175.
4. VHA disability ratings. Veterans Affairs. Published February 4, 2022. Accessed June 14, 2022. <https://www.va.gov/disability/about-disability-ratings/>
5. Bradley KA, Bush KR, Epler AJ, et al. Two brief alcohol-screening tests From the Alcohol Use Disorders Identification Test (AUDIT): validation in a female Veterans Affairs patient population. *Arch Intern Med*. 2003;163(7):821-829.
6. Krein SL, Bingham CR, McCarthy JF, Mitchinson A, Payes J, Valenstein M. Diabetes treatment among VA patients with comorbid serious mental illness. *Psychiatr Serv*. 2006 Jul;57(7):1016–21.
7. Norton JM, Ali K, Jurkowitz CT, Kiryluk K, Park M, Kawamoto K, et al. Development and Validation of a Pragmatic Electronic Phenotype for CKD. *Clin J Am Soc Nephrol*. 2019 Sep 6;14(9):1306–14.
8. Eknoyan G, Lameire N, Eckardt K, Kasiske B, Wheeler D, Levin A, et al. KDIGO 2012 clinical practice guideline for the evaluation and management of chronic kidney disease. *Kidney Int*. 2013;3(1):5–14.
9. Groeneveld PW, Medvedeva EL, Walker L, Segal AG, Richardson DM, Epstein AJ. Outcomes of Care for Ischemic Heart Disease and Chronic Heart Failure in the Veterans Health Administration. *JAMA Cardiol*. 2018 Jul 1;3(7):563–71.
10. Tison GH, Chamberlain AM, Pletcher MJ, Dunlay SM, Weston SA, Killian JM, et al. Identifying heart failure using EMR-based algorithms. *Int J Med Inform*. 2018 Dec;120:1–7.
11. Newton KM, Peissig PL, Kho AN, et al. Validation of electronic medical record-based phenotyping algorithms: results and lessons learned from the eMERGE network. *J Am Med Inform Assoc*. 2013;20(e1):e147-54.
12. Cheng D, DuMontier C, Yildirim C, et al. Updating and Validating the U.S. Veterans Affairs Frailty Index: Transitioning From ICD-9 to ICD-10. *J Gerontol A Biol Sci Med Sci*. 2021;76(7):1318-1325.
13. Kho AN, Hayes MG, Rasmussen-Torvik L, et al. Use of diverse electronic medical record systems to identify genetic risk for type 2 diabetes within a genome-wide association study. *J Am Med Inform Assoc*. 2012;19(2):212-218.
14. Dave CV, Schneeweiss S, Wexler DJ, Brill G, Patorno E. Trends in Clinical Characteristics and Prescribing Preferences for SGLT2 Inhibitors and GLP-1 Receptor Agonists, 2013-2018. *Diabetes Care*. 2020;43(4):921-924.
15. Neuhaus JM, McCulloch CE. Separating between- and within-cluster covariate effects by using conditional and partitioning methods. *J R Stat Soc Series B Stat Methodol*. 2006;68(5):859-872.
